# Supplementary material for: Synthesis and visible photocatalytic activities of a Au@Ag@ZnO triple layer core–shell nanostructure
Source: Royal Society of Chemistry journal article supplement (doi:10.1039/c4nj00569d), 2014-01-01
Supplement: c4nj00569d1.pdf [file c4nj00569d1.pdf]

### Supporting information section

| Sample Name | Au SPR absorption | Ag SPR absorption |
|-------------|-------------------|-------------------|
| S1          | 533 nm            | -                 |
| S2          | 529 nm            | -                 |
| S3          | 527 nm            | -                 |
| S4          | 526 nm            | 425 nm            |
| S5          | ~523 nm           | 420 nm            |

**Table S1. SPR absorption of samples S1 to S5**

| Sample name | pH of the solution | Au SPR absorption | Au@ZnO layer absorption |
|-------------|--------------------|-------------------|-------------------------|
| S6          | 10                 | ~ 506 nm          | ~ 428 nm                |
| S7          | 11                 | ~ 502 nm          | ~ 406 nm                |
| S8          | 12                 | ~ 501 nm          | ~ 370 nm                |

**Table S2. Absorption of Au@Ag@ZnO (samples S6 to S9)**

| Sample name | Au nanoparticle size (nm) | Ag layer thickness (nm) | ZnO layer thickness (nm) |
|-------------|---------------------------|-------------------------|--------------------------|
| S1          | 10-20                     | -                       | -                        |
| S2          | 10- 22                    | 0.5-1                   |                          |
| S3          | 14-21                     | 1-1.75                  |                          |
| S4          | 16-21                     | 2-2.5                   |                          |
| S5          | 17-22                     | 28-34                   |                          |
| S6          | 16-21                     | 2-2.5                   | 1-2.75                   |
| S7          | 16-20                     | 2-2.5                   | 2-3                      |
| S8          | 16-21                     | 2-2.5                   | 2.5-4                    |

**Table S3. Nanoparticle sizes and shell thickness**
